# Supplementary material
Source: PubMed Central journal article supplement (PMC5626954)
Supplement: JB.00261-17_zjb999094558s1.pdf [file JB.00261-17_zjb999094558s1.pdf]

Table S1. Bacterial strains, plasmids, and primers used in this study.

| Bacterial strain or plasmid | Description                                                                                                                                                                                                                        | Reference or source |
|-----------------------------|------------------------------------------------------------------------------------------------------------------------------------------------------------------------------------------------------------------------------------|---------------------|
| <u><i>P. aeruginosa</i></u> |                                                                                                                                                                                                                                    |                     |
| PAO1                        | Wild type strain                                                                                                                                                                                                                   | (1)                 |
| PAO1 $\Delta lasR$          | PAO1 containing an unmarked, in-frame <i>lasR</i> deletion                                                                                                                                                                         | (2)                 |
| PAO1 $\Delta lasI$          | PAO1 containing an unmarked, in-frame <i>lasI</i> deletion                                                                                                                                                                         | (3)                 |
| PAO1 $\Delta nuh$           | PAO1 containing an unmarked, in-frame <i>nuh</i> deletion                                                                                                                                                                          | This work           |
| PAO1 $\Delta PA0148$        | PAO1 containing an unmarked, in-frame <i>nuh</i> deletion                                                                                                                                                                          | This work           |
| <u>PAO1 variants</u>        |                                                                                                                                                                                                                                    |                     |
| A                           | Isolated after daily transfer in 0.75% adenosine / 0.25% casein for 25 days                                                                                                                                                        | (4)                 |
| B                           | Isolated after daily transfer in 0.75% adenosine / 0.25% casein for 25 days                                                                                                                                                        | (4)                 |
| C                           | Isolated after daily transfer in 0.9% adenosine / 0.1% casein for 14 days                                                                                                                                                          | This work           |
| D                           | Isolated after daily transfer in 0.9% adenosine / 0.1% casein for 14 days                                                                                                                                                          | This work           |
| E                           | Isolated after daily transfer in 0.9% adenosine / 0.1% casein for 14 days                                                                                                                                                          | This work           |
| <i>E. coli</i> DH5 $\alpha$ | F <sup>-</sup> $\Phi 80 lacZ \Delta M15 \Delta(lacZYA-argF)$ U169 <i>recA1 endA1 hsdR17</i> (r <sub>k</sub> <sup>-</sup> , m <sub>k</sub> <sup>+</sup> )<br><i>phoAsupE44 thi-1 gyrA96 relA1 <math>\lambda</math></i> <sup>-</sup> | Invitrogen          |
| <u>Plasmids</u>             |                                                                                                                                                                                                                                    |                     |
| pJN105                      | <i>araC</i> -P <sub>Bad</sub> cassette cloned in pBBR1MCS-5, Gm <sup>r</sup>                                                                                                                                                       | (5)                 |
| pJN105.nuh                  | Arabinose inducible <i>nuh</i> in pJN105, Gm <sup>r</sup>                                                                                                                                                                          | This work           |
| pPROBE-GT                   | Broad-host-range pVS1/p15a GFP reporter, Gm <sup>r</sup>                                                                                                                                                                           | (6)                 |
| pBBR1MCS-5                  | Medium copy, BHR plasmid vector (pBBR), Gm <sup>r</sup>                                                                                                                                                                            | (7)                 |
| Pnuh-wt                     | pPROBE-GT with the -91 through 15 of the 5' region of <i>nuh</i> from PAO1 inserted with HindIII and BamHI, Gm <sup>r</sup>                                                                                                        | This work           |
| Pnuh-var                    | pPROBE-GT with the -91 through 15 of the 5' region of <i>nuh</i> from variant A inserted with HindIII and BamHI, Gm <sup>r</sup>                                                                                                   | This work           |
| pJT3                        | pBBR1MCS with PA0148 inserted with HindIII and SacI, Gm <sup>r</sup>                                                                                                                                                               | This work           |
| pJT4                        | pBBR1MCS with <i>nuh</i> inserted with HindIII and SacI, Gm <sup>r</sup>                                                                                                                                                           | This work           |
| pJT5                        | pBBR1MCS with PA0144 inserted with HindIII and SacI, Gm <sup>r</sup>                                                                                                                                                               | This work           |
| pJT7wt                      | pBBR1MCS with PA0142 through PA0148 assembled from PAO1, Gm <sup>r</sup>                                                                                                                                                           | This work           |
| pJT7var                     | pBBR1MCS with PA0142 through PA0148 assembled from Variant A, Gm <sup>r</sup>                                                                                                                                                      | This work           |
| pJT10                       | pBBR1MCS with PA0143 and PA0148 assembled from PAO1, Gm <sup>r</sup>                                                                                                                                                               | This work           |

## Primers

---

|                       |                                                                        |
|-----------------------|------------------------------------------------------------------------|
| Pnuh.BamHI R          | 5' – AAAAAGGATCCCAAAGCGATTGCATGGGCG – 3'                               |
| Pnuh.HindIII F        | 5' – TTTTAAAGCTTGTTGATGCGGGTTCCGGTA G – 3'                             |
| nuhF300               | 5' – CTCGGCGCTGCTGCTGTGCG – 3'                                         |
| nuhR300               | 5' – GGACAGCGGCACCGCCTTCG – 3'                                         |
| pJT3 F.PA0148.HindIII | 5' – TTCAAGCTTCTACTCCATGCCGTTCTTCG – 3'                                |
| pJT3 R.PA0148.SacI    | 5' – TTCGAGCTCCAGAAGCGCAGGAACAGTTC – 3'                                |
| pJT4 F.nuh.HindIII    | 5' – TTCAAGCTTCTCGGCGCTGCTGCTGTGCG – 3'                                |
| pJT4 R.nuh.SacI       | 5' – TTCGAGCTCGGACAGCGGCACCGCCTTCG – 3'                                |
| pJT5 F.PA0144.HindIII | 5' – TTCAAGCTTTATATGCCTACCTCAGCGATG – 3'                               |
| pJT5 F.PA0144.SacI    | 5' – TTCGAGCTCCTACGTCCAGTACGACATCAA – 3'                               |
| pJT7.F                | 5' – GGGATGTGCTGCAAGGCGATTAAGTTGGGTAACGCCAGGACGCCTCGAACATGATCCTC – 3'  |
| pJT7.R                | 5' – CACACAGGAAACAGCTATGACCATGATTACGCCAAGCGCGCATCAATACCGAGAAGCCGG – 3' |
| pJT7_V.F              | 5' – GCAAGGCGTTTCGTCGTCGCCGGCTTCTCGGTATTGATGCGCGCTTGGCGTAATCATGG – 3'  |
| pJT7_V.R              | 5' – ACAGGGCCTGGCGCGCCTCGAGGATCATGTTTCGAGGCGTCCTGGCGTTACCCAACTTAA – 3' |
| pJT10_PA0148 F        | 5' – GCATAGCCGACCTCGAAGGCGGTGCCGCTGTCCCTACTCCATGCCGTTCTTCGC – 3'       |
| pJT10_nuh R           | 5' – GTCCATGTGCGGTTTCGGCGAAGAACGGCATGGAGTAGGGACAGCGGCACCGCCTTCG – 3'   |
| pJT11.D1              | 5' – TGTAAGCAAGCTTCTGCAGGTCGACTCTAGAGGATCGCCTGCTGGTGGAACAGATC – 3'     |
| pJT11.D2              | 5' – GCTTTTCAGCGCAGGCTCCAGAAACCCAGGCGATGCCGAACACGTCCGGCTC – 3'         |
| pJT11.D3              | 5' – GCCGCCTACGAGCCGGACGTGTTTCGGCATCGCCTGGGTTTCTGGAGC – 3'             |
| pJT11.D4              | 5' – CGTGGAAATTAATTAAGGTACCGAATTCGAGCTCGAGGCCGCTGCTGGTCTTCATG – 3'     |
| pJT11_V.F             | 5' – GACCCGCGGATTTTCTGCTCAATCGCATCCACGGCTCGAGCTCGAATTCGGTACC – 3'      |
| pJT11_V.R             | 5' – GCTACGGGTGATATCGATCTTCAGCTTCTCTTCGACGGGGATCCTCTAGAGTCGAC – 3'     |

---

## REFERENCES

1. **Stover CK, Pham XQ, Erwin AL, Mizoguchi SD, Warren P, Hickey MJ, Brinkman FSL, Hufnagle WO, Kowalik DJ, Lagrou M, Garber RL, Goltry L, Tolentino E, Westbrook-Wadman S, Yuan Y, Brody LL, Coulter SN, Folger KR, Kas A, Larbig K, Lim R, Smith K, Spencer D, Wong GK-S, Wu Z, Paulsen IT, Reizer J, Saier MH, Hancock REW, Lory S, Olson M V.** 2000. Complete genome sequence of *Pseudomonas aeruginosa* PAO1, an opportunistic pathogen. *Nature* **406**:959–964.
2. **Wang M, Schaefer AL, Dandekar AA, Greenberg EP.** 2015. Quorum sensing and policing of *Pseudomonas aeruginosa* social cheaters. *Proc Natl Acad Sci U S A* **112**:2187–2191.
3. **Scholz RL, Greenberg EP.** 2017. Positive autoregulation of an acyl-homoserine lactone quorum-sensing circuit synchronizes the population response. *mBio* **8**:e01079-17
4. **Dandekar AA, Chugani S, Greenberg EP.** 2012. Bacterial quorum sensing and metabolic incentives to cooperate. *Science* **338**:264 LP-266.
5. **Newman JR, Fuqua C.** 1999. Broad-host-range expression vectors that carry the l-arabinose-inducible *Escherichia coli* *araBAD* promoter and the *araC* regulator. *Gene* **227**:197–203.
6. **Miller WG, Leveau JHJ, Lindow SE.** 2000. Improved *gfp* and *inaZ* Broad-Host-Range Promoter-Probe Vectors. *Mol Plant-Microbe Interact* **13**:1243–1250.
7. **Kovach ME, Elzer PH, Hill DS, Robertson GT, Farris MA, Roop RM, Peterson KM.** 1995. Four new derivatives of the broad host range cloning vector PBBR1MCS, carrying different antibiotic resistance cassettes. *Gene* **166**:175–176.
