# Supplementary material
Source: PubMed Central journal article supplement (PMC5626954)
Supplement: JB.00261-17_zjb999094558s2.pdf [file JB.00261-17_zjb999094558s2.pdf]

**Table S2. Mutations in evolved adenosine growth variants as compared to the parent strain PAO1.**

<sup>a</sup> Adenosine growth variants described in Table 1.

<sup>b</sup> Genomic location of the mutation start and stop, reference sequence, and gene locus tag/name according to Pseudomonas.com.

<sup>c-h</sup> Mutation identified by StrandNGS version 2.9 SNP Detection and SNP Effect Analysis using default parameters. SNPs present in >90% of reads, excluding synonymous changes, are presented here.

Variant allele call was determined by the percent of reads at the indicated locus that differ from the published PAO1 sequence. SNP detection threshold was set to a minimum of 10 reads per locus for consideration.

| Variant A <sup>a</sup> |                  |                        |                             |                           |                          |                          |                               |                                  |                                |  |
|------------------------|------------------|------------------------|-----------------------------|---------------------------|--------------------------|--------------------------|-------------------------------|----------------------------------|--------------------------------|--|
| Start <sup>b</sup>     | End <sup>b</sup> | Reference <sup>b</sup> | Variant Allele <sup>c</sup> | Variant Type <sup>d</sup> | Gene Symbol <sup>b</sup> | Consequence <sup>e</sup> | Position in cDNA <sup>f</sup> | Position in Protein <sup>g</sup> | Amino Acid Change <sup>h</sup> |  |
| 113827                 | 113827           | C                      | T                           | Substitution              | PA0093                   | Non-synonymous           | 769-769                       | 257-257                          | A->T                           |  |
| 163308                 | 163308           | C                      | T                           | Substitution              |                          | Intergenic               |                               |                                  |                                |  |
| 259508                 | 259508           | A                      | G                           | Substitution              | pcaT                     | Non-synonymous           | 1046-1046                     | 349-349                          | Y->C                           |  |
| 303356                 | 303356           | A                      | G                           | Substitution              | PA0267                   | Non-synonymous           | 533-533                       | 178-178                          | E->G                           |  |
| 545860                 | 545860           | A                      | G                           | Substitution              |                          | Intergenic               |                               |                                  |                                |  |
| 595070                 | 595070           | A                      | G                           | Substitution              | PA0535                   | Non-synonymous           | 491-491                       | 164-164                          | H->R                           |  |
| 604691                 | 604691           | A                      | G                           | Substitution              | metK                     | Non-synonymous           | 206-206                       | 69-69                            | G->P                           |  |
| 640628                 | 640628           | A                      | G                           | Substitution              | PA0581                   | Non-synonymous           | 362-362                       | 121-121                          | L->P                           |  |
| 699304                 | 699304           | C                      | T                           | Substitution              |                          | Intergenic               |                               |                                  |                                |  |
| 923077                 | 923077           | T                      | C                           | Substitution              | PA0845                   | Non-synonymous           | 728-728                       | 243-243                          | N->S                           |  |
| 950377                 | 950377           | A                      | G                           | Substitution              | pbpG                     | Non-synonymous           | 272-272                       | 91-91                            | I->T                           |  |
| 1014333                | 1014333          | C                      | T                           | Substitution              | gacS                     | Non-synonymous           | 1420-1420                     | 474-474                          | G->S                           |  |
| 1085710                | 1085710          | C                      | T                           | Substitution              | phnB                     | Non-synonymous           | 169-169                       | 57-57                            | P->S                           |  |
| 1153625                | 1153625          | A                      | G                           | Substitution              |                          | Intergenic               |                               |                                  |                                |  |
| 1194861                | 1194861          | C                      | T                           | Substitution              | flgG                     | Early termination        | 655-655                       | 219-219                          | Q->Stop                        |  |
| 1202170                | 1202170          | A                      | G                           | Substitution              | PA1110                   | Non-synonymous           | 635-635                       | 212-212                          | L->P                           |  |
| 1240153                | 1240153          | C                      | T                           | Substitution              | PA1147                   | Non-synonymous           | 172-172                       | 58-58                            | G->S                           |  |
| 1452387                | 1452387          | A                      | G                           | Substitution              | ggt                      | Non-synonymous           | 1006-1006                     | 336-336                          | Y->H                           |  |
| 1485378                | 1485378          | A                      | G                           | Substitution              | PA1370                   | Non-synonymous           | 1481-1481                     | 494-494                          | D->G                           |  |
| 1677877                | 1677877          | A                      | AG                          | Insertion                 | PA1539                   | Frameshift               | 319-320                       |                                  |                                |  |
| 1799968                | 1799968          | T                      | C                           | Substitution              | PA1652                   | Non-synonymous           | 584-584                       | 195-195                          | V->A                           |  |
| 2043443                | 2043443          | G                      | A                           | Substitution              | PA1874                   | Non-synonymous           | 7003-7003                     | 2335-2335                        | G->S                           |  |
| 2134424                | 2134424          | C                      | T                           | Substitution              | rrsR                     | Non-synonymous           | 32-32                         | 43050                            | A->V                           |  |
| 2178500                | 2178500          | A                      | G                           | Substitution              | ercS                     | Non-synonymous           | 380-380                       | 127-127                          | D->G                           |  |
| 2211750                | 2211750          | A                      | G                           | Substitution              | PA2019                   | Non-synonymous           | 763-763                       | 255-255                          | Y->H                           |  |
| 2366367                | 2366367          | A                      | G                           | Substitution              | PA2151                   | Non-synonymous           | 262-262                       | 88-88                            | S->G                           |  |
| 2411751                | 2411751          | A                      | AC                          | Insertion                 | PA2192                   | Frameshift               | 43-44                         |                                  |                                |  |
| 2621413                | 2621413          | A                      | G                           | Substitution              | PA2371                   | Non-synonymous           | 701-701                       | 234-234                          | E->G                           |  |
| 2808355                | 2808355          | T                      | C                           | Substitution              | mexT                     | Non-synonymous           | 887-887                       | 296-296                          | L->P                           |  |
| 2812077                | 2812077          | G                      | A                           | Substitution              | mexF                     | Non-synonymous           | 2069-2069                     | 690-690                          | R->H                           |  |
| 2883502                | 2883502          | T                      | C                           | Substitution              | PA2551                   | Non-synonymous           | 346-346                       | 116-116                          | F->L                           |  |
| 2902224                | 2902224          | A                      | G                           | Substitution              | PA2567                   | Non-synonymous           | 42923                         | 42797                            | T->A                           |  |
| 3134097                | 3134097          | G                      | A                           | Substitution              | PA2776                   | Non-synonymous           | 388-388                       | 130-130                          | A->T                           |  |
| 3409694                | 3409694          | T                      | C                           | Substitution              | PA3046                   | Non-synonymous           | 260-260                       | 87-87                            | K->R                           |  |
| 3445522                | 3445522          | T                      | C                           | Substitution              | PA3073                   | Non-synonymous           | 287-287                       | 96-96                            | V->A                           |  |
| 3469013                | 3469013          | G                      | A                           | Substitution              | PA3091                   | Non-synonymous           | 1415-1415                     | 472-472                          | T->M                           |  |
| 3619006                | 3619006          | T                      | C                           | Substitution              | PA3232                   | Non-synonymous           | 614-614                       | 205-205                          | K->R                           |  |
| 3727431                | 3727431          | T                      | C                           | Substitution              | PA3324                   | Non-synonymous           | 980-980                       | 327-327                          | L->P                           |  |
| 3957397                | 3957397          | C                      | T                           | Substitution              | PA3535                   | Early termination        | 2491-2491                     | 831-831                          | Q->Stop                        |  |
| 3974147                | 3974147          | G                      | A                           | Substitution              |                          | Intergenic               |                               |                                  |                                |  |
| 4056590                | 4056592          | TGC                    | T                           | Deletion                  | mutS                     | Frameshift               | 2067-2068                     |                                  |                                |  |
| 4056590                | 4056591          | TG                     | T                           | Deletion                  | mutS                     | Frameshift               | 2067-2067                     |                                  |                                |  |
| 4056591                | 4056592          | GC                     | G                           | Deletion                  | mutS                     | Frameshift               | 2068-2068                     |                                  |                                |  |
| 4363221                | 4363221          | G                      | C                           | Substitution              |                          | Intergenic               |                               |                                  |                                |  |
| 4583242                | 4583242          | T                      | C                           | Substitution              | PA4100                   | Non-synonymous           | 391-391                       | 131-131                          | Y->H                           |  |
| 4623580                | 4623580          | C                      | T                           | Substitution              | PA4133                   | Non-synonymous           | 769-769                       | 257-257                          | P->S                           |  |
| 4660228                | 4660228          | G                      | A                           | Substitution              | PA4164                   | Non-synonymous           | 42955                         | 42797                            | R->Q                           |  |
| 4725345                | 4725345          | T                      | C                           | Substitution              | fptA                     | Non-synonymous           | 1457-1457                     | 486-486                          | D->G                           |  |
| 4830052                | 4830052          | G                      | A                           | Substitution              | rcpC                     | Non-synonymous           | 503-503                       | 168-168                          | P->L                           |  |
| 4926640                | 4926640          | G                      | A                           | Substitution              | PA4396                   | Non-synonymous           | 742-742                       | 248-248                          | G->S                           |  |
| 5011330                | 5011330          | G                      | GC                          | Insertion                 | mreC                     | Frameshift               | 984-985                       |                                  |                                |  |
| 5026900                | 5026900          | G                      | A                           | Substitution              | PA4491                   | Non-synonymous           | 484-484                       | 162-162                          | R->C                           |  |
| 5036675                | 5036675          | A                      | AC                          | Insertion                 | PA4499                   | Frameshift               | 431-432                       |                                  |                                |  |
| 5095955                | 5095955          | T                      | C                           | Substitution              | pilR                     | Non-synonymous           | 971-971                       | 324-324                          | L->P                           |  |
| 5115713                | 5115713          | G                      | A                           | Substitution              | obg                      | Non-synonymous           | 178-178                       | 60-60                            | R->C                           |  |
| 5351169                | 5351169          | A                      | G                           | Substitution              | recN                     | Non-synonymous           | 1241-1241                     | 414-414                          | E->G                           |  |
| 5375556                | 5375556          | C                      | T                           | Substitution              |                          | Intergenic               |                               |                                  |                                |  |
| 5412277                | 5412277          | A                      | G                           | Substitution              |                          | Intergenic               |                               |                                  |                                |  |
| 5452051                | 5452051          | G                      | A                           | Substitution              |                          | Intergenic               |                               |                                  |                                |  |
| 5716803                | 5716803          | A                      | G                           | Substitution              | mdoH                     | Non-synonymous           | 53-53                         | 18-18                            | L->P                           |  |
| 5756292                | 5756293          | GC                     | G                           | Deletion                  |                          | Intergenic               |                               |                                  |                                |  |
| 5759063                | 5759063          | A                      | G                           | Substitution              | PA5114                   | Non-synonymous           | 2281-2281                     | 761-761                          | F->L                           |  |
| 5897201                | 5897201          | T                      | C                           | Substitution              | PA5238                   | Non-synonymous           | 1594-1594                     | 532-532                          | S->G                           |  |

| Variant B <sup>a</sup> |                  |                        |                             |                           |                          |                          |                               |                                  |                                |  |
|------------------------|------------------|------------------------|-----------------------------|---------------------------|--------------------------|--------------------------|-------------------------------|----------------------------------|--------------------------------|--|
| Start <sup>b</sup>     | End <sup>b</sup> | Reference <sup>b</sup> | Variant Allele <sup>c</sup> | Variant Type <sup>d</sup> | Gene Symbol <sup>b</sup> | Consequence <sup>e</sup> | Position in cDNA <sup>f</sup> | Position in Protein <sup>g</sup> | Amino Acid Change <sup>h</sup> |  |
| 163308                 | 163308           | C                      | T                           | Substitution              |                          | Intergenic               |                               |                                  |                                |  |
| 411125                 | 411126           | AC                     | A                           | Deletion                  |                          | Intergenic               |                               |                                  |                                |  |
| 2169348                | 2169348          | A                      | AG                          | Insertion                 |                          | Intergenic               |                               |                                  |                                |  |
| 2809595                | 2809596          | AC                     | A                           | Deletion                  | mexE                     | Frameshift               | 854-854                       |                                  |                                |  |
| 5071543                | 5071544          | AA                     | A                           | Deletion                  |                          | Intergenic               |                               |                                  |                                |  |
| 5655220                | 5655220          | C                      | CCGG                        | Insertion                 | PA5024                   | Non-synonymous           | 665-666                       |                                  |                                |  |

| Variant C <sup>a</sup>                     |                  |                        |                             |                           |                          |                          |                               |                                  |                                |  |
|--------------------------------------------|------------------|------------------------|-----------------------------|---------------------------|--------------------------|--------------------------|-------------------------------|----------------------------------|--------------------------------|--|
| Start <sup>b</sup>                         | End <sup>b</sup> | Reference <sup>b</sup> | Variant Allele <sup>c</sup> | Variant Type <sup>d</sup> | Gene Symbol <sup>b</sup> | Consequence <sup>e</sup> | Position in cDNA <sup>f</sup> | Position in Protein <sup>g</sup> | Amino Acid Change <sup>h</sup> |  |
| No SNP present at 90% or greater frequency |                  |                        |                             |                           |                          |                          |                               |                                  |                                |  |

**Variant D<sup>a</sup>**

| Start <sup>b</sup> | End <sup>b</sup> | Reference <sup>b</sup> | Variant Allele <sup>c</sup> | Variant Type <sup>d</sup> | Gene Symbol <sup>b</sup> | Consequence <sup>g</sup> | Position in cDNA <sup>h</sup> | Position in Protein <sup>i</sup> | Amino Acid Change <sup>d</sup> |
|--------------------|------------------|------------------------|-----------------------------|---------------------------|--------------------------|--------------------------|-------------------------------|----------------------------------|--------------------------------|
| 5036641            | 5036641          | G                      | A                           | Substitution              | PA4499                   | Non-synonymous           | 397-397                       | 133-133                          | G->R                           |

**Variant E<sup>a</sup>**

| Start <sup>b</sup> | End <sup>b</sup> | Reference <sup>b</sup> | Variant Allele <sup>c</sup> | Variant Type <sup>d</sup> | Gene Symbol <sup>b</sup> | Consequence <sup>g</sup> | Position in cDNA <sup>h</sup> | Position in Protein <sup>i</sup> | Amino Acid Change <sup>d</sup> |
|--------------------|------------------|------------------------|-----------------------------|---------------------------|--------------------------|--------------------------|-------------------------------|----------------------------------|--------------------------------|
|--------------------|------------------|------------------------|-----------------------------|---------------------------|--------------------------|--------------------------|-------------------------------|----------------------------------|--------------------------------|

No SNP present at 90% or greater frequency
