# Supplementary material
Source: PubMed Central journal article supplement (PMC5626954)
Supplement: JB.00261-17_zjb999094558s3.pdf [file JB.00261-17_zjb999094558s3.pdf]

Table S3. Location and weighted copy number of duplications in adenosine growth variants

\* Genomic location of the start and stop, and gene locus tag/name according to pseudomonas.com.

\*\* Adenosine growth variants described in Table 1.

\*\*\* GDA calculations were performed using StrandNGS version 2.9 WG CNV (whole genome copy number variation) Detection with default parameters. Two separate wild-type PAO1 sequences were used as "normal" samples to define baseline gene copy number using the "tumor-normal" pairing, while each adenosine variant was defined as "tumor."

\*\*\*\* StrandNGS version 2.9 assumes analysis of diploid organisms and sets baseline copy number of genes at 2. To correct for this, the weighted copy number was divided by 2 to reflect the haploid nature of bacteria and then rounded to the nearest whole number. Highlighted regions are those genes with weighted copy number > 1.0

| PAO1 Gene * |        |        |                           | Variant A <sup>†</sup>              |                             |                                   |                           | Variant B <sup>‡</sup>              |                             |                                   |                           | Variant C <sup>§</sup>              |                             |                                   |                           | Variant D <sup>¶</sup>              |                             |                                   |                           | Variant E <sup>  </sup>             |                             |                                   |                           |                                     |                             |                                   |     |   |
|-------------|--------|--------|---------------------------|-------------------------------------|-----------------------------|-----------------------------------|---------------------------|-------------------------------------|-----------------------------|-----------------------------------|---------------------------|-------------------------------------|-----------------------------|-----------------------------------|---------------------------|-------------------------------------|-----------------------------|-----------------------------------|---------------------------|-------------------------------------|-----------------------------|-----------------------------------|---------------------------|-------------------------------------|-----------------------------|-----------------------------------|-----|---|
| Start       | End    | Gene   | #CNV Regions <sup>¶</sup> | #Amplification Regions <sup>¶</sup> | Percent Normal <sup>¶</sup> | Weighted Copy Number <sup>¶</sup> | #CNV Regions <sup>¶</sup> | #Amplification Regions <sup>¶</sup> | Percent Normal <sup>¶</sup> | Weighted Copy Number <sup>¶</sup> | #CNV Regions <sup>¶</sup> | #Amplification Regions <sup>¶</sup> | Percent Normal <sup>¶</sup> | Weighted Copy Number <sup>¶</sup> | #CNV Regions <sup>¶</sup> | #Amplification Regions <sup>¶</sup> | Percent Normal <sup>¶</sup> | Weighted Copy Number <sup>¶</sup> | #CNV Regions <sup>¶</sup> | #Amplification Regions <sup>¶</sup> | Percent Normal <sup>¶</sup> | Weighted Copy Number <sup>¶</sup> | #CNV Regions <sup>¶</sup> | #Amplification Regions <sup>¶</sup> | Percent Normal <sup>¶</sup> | Weighted Copy Number <sup>¶</sup> |     |   |
| 131808      | 132602 | PAO110 | 1                         | 1                                   | 51.45                       | 48.55                             | 1.31                      | 0                                   | 0                           | 100                               | 1                         | 0                                   | 0                           | 100                               | 1                         | 0                                   | 0                           | 100                               | 1                         | 0                                   | 0                           | 100                               | 1                         | 0                                   | 0                           | 100                               | 1   |   |
| 132577      | 133155 | PAO111 | 1                         | 1                                   | 100                         | 0                                 | 1.61                      | 0                                   | 0                           | 100                               | 1                         | 0                                   | 0                           | 100                               | 1                         | 0                                   | 0                           | 100                               | 1                         | 0                                   | 0                           | 100                               | 1                         | 0                                   | 0                           | 100                               | 1   |   |
| 133220      | 134299 | PAO112 | 1                         | 1                                   | 100                         | 0                                 | 1.61                      | 0                                   | 0                           | 100                               | 1                         | 0                                   | 0                           | 100                               | 1                         | 0                                   | 0                           | 100                               | 1                         | 0                                   | 0                           | 100                               | 1                         | 0                                   | 0                           | 100                               | 1   |   |
| 134319      | 135233 | PAO113 | 1                         | 1                                   | 100                         | 0                                 | 1.61                      | 0                                   | 0                           | 100                               | 1                         | 0                                   | 0                           | 100                               | 1                         | 0                                   | 0                           | 100                               | 1                         | 0                                   | 0                           | 100                               | 1                         | 0                                   | 0                           | 100                               | 1   |   |
| 135259      | 135894 | serC   | 1                         | 1                                   | 100                         | 0                                 | 1.61                      | 0                                   | 0                           | 100                               | 1                         | 0                                   | 0                           | 100                               | 1                         | 0                                   | 0                           | 100                               | 1                         | 0                                   | 0                           | 100                               | 1                         | 0                                   | 0                           | 100                               | 1   |   |
| 135934      | 136386 | PAO115 | 1                         | 1                                   | 100                         | 0                                 | 1.61                      | 0                                   | 0                           | 100                               | 1                         | 0                                   | 0                           | 100                               | 1                         | 0                                   | 0                           | 100                               | 1                         | 0                                   | 0                           | 100                               | 1                         | 0                                   | 0                           | 100                               | 1   |   |
| 136518      | 136991 | PAO116 | 1                         | 1                                   | 100                         | 0                                 | 1.61                      | 0                                   | 0                           | 100                               | 1                         | 0                                   | 0                           | 100                               | 1                         | 0                                   | 0                           | 100                               | 1                         | 0                                   | 0                           | 100                               | 1                         | 0                                   | 0                           | 100                               | 1   |   |
| 137248      | 137976 | PAO117 | 1                         | 1                                   | 100                         | 0                                 | 1.61                      | 0                                   | 0                           | 100                               | 1                         | 0                                   | 0                           | 100                               | 1                         | 0                                   | 0                           | 100                               | 1                         | 0                                   | 0                           | 100                               | 1                         | 0                                   | 0                           | 100                               | 1   |   |
| 138001      | 138588 | PAO118 | 1                         | 1                                   | 100                         | 0                                 | 1.61                      | 0                                   | 0                           | 100                               | 1                         | 0                                   | 0                           | 100                               | 1                         | 0                                   | 0                           | 100                               | 1                         | 0                                   | 0                           | 100                               | 1                         | 0                                   | 0                           | 100                               | 1   |   |
| 138818      | 140167 | PAO119 | 1                         | 1                                   | 100                         | 0                                 | 1.61                      | 0                                   | 0                           | 100                               | 1                         | 0                                   | 0                           | 100                               | 1                         | 0                                   | 0                           | 100                               | 1                         | 0                                   | 0                           | 100                               | 1                         | 0                                   | 0                           | 100                               | 1   |   |
| 140216      | 140902 | PAO120 | 1                         | 1                                   | 100                         | 0                                 | 1.61                      | 0                                   | 0                           | 100                               | 1                         | 0                                   | 0                           | 100                               | 1                         | 0                                   | 0                           | 100                               | 1                         | 0                                   | 0                           | 100                               | 1                         | 0                                   | 0                           | 100                               | 1   |   |
| 141003      | 141737 | PAO121 | 1                         | 1                                   | 100                         | 0                                 | 1.61                      | 0                                   | 0                           | 100                               | 1                         | 0                                   | 0                           | 100                               | 1                         | 0                                   | 0                           | 100                               | 1                         | 0                                   | 0                           | 100                               | 1                         | 0                                   | 0                           | 100                               | 1   |   |
| 141917      | 142327 | PAO122 | 1                         | 1                                   | 100                         | 0                                 | 1.61                      | 0                                   | 0                           | 100                               | 1                         | 0                                   | 0                           | 100                               | 1                         | 0                                   | 0                           | 100                               | 1                         | 0                                   | 0                           | 100                               | 1                         | 0                                   | 0                           | 100                               | 1   |   |
| 142359      | 143167 | PAO123 | 1                         | 1                                   | 100                         | 0                                 | 1.61                      | 0                                   | 0                           | 100                               | 1                         | 0                                   | 0                           | 100                               | 1                         | 0                                   | 0                           | 100                               | 1                         | 0                                   | 0                           | 100                               | 1                         | 0                                   | 0                           | 100                               | 1   |   |
| 143567      | 143848 | PAO124 | 1                         | 1                                   | 100                         | 0                                 | 1.61                      | 0                                   | 0                           | 100                               | 1                         | 0                                   | 0                           | 100                               | 1                         | 0                                   | 0                           | 100                               | 1                         | 0                                   | 0                           | 100                               | 1                         | 0                                   | 0                           | 100                               | 1   |   |
| 143845      | 144072 | PAO125 | 1                         | 1                                   | 100                         | 0                                 | 1.61                      | 0                                   | 0                           | 100                               | 1                         | 0                                   | 0                           | 100                               | 1                         | 0                                   | 0                           | 100                               | 1                         | 0                                   | 0                           | 100                               | 1                         | 0                                   | 0                           | 100                               | 1   |   |
| 144248      | 144868 | PAO126 | 1                         | 1                                   | 100                         | 0                                 | 1.61                      | 0                                   | 0                           | 100                               | 1                         | 0                                   | 0                           | 100                               | 1                         | 0                                   | 0                           | 100                               | 1                         | 0                                   | 0                           | 100                               | 1                         | 0                                   | 0                           | 100                               | 1   |   |
| 144969      | 145469 | PAO127 | 1                         | 1                                   | 100                         | 0                                 | 1.61                      | 0                                   | 0                           | 100                               | 1                         | 0                                   | 0                           | 100                               | 1                         | 0                                   | 0                           | 100                               | 1                         | 0                                   | 0                           | 100                               | 1                         | 0                                   | 0                           | 100                               | 1   |   |
| 145542      | 145883 | PAO128 | 1                         | 1                                   | 100                         | 0                                 | 1.61                      | 0                                   | 0                           | 100                               | 1                         | 0                                   | 0                           | 100                               | 1                         | 0                                   | 0                           | 100                               | 1                         | 0                                   | 0                           | 100                               | 1                         | 0                                   | 0                           | 100                               | 1   |   |
| 145965      | 147392 | gabP   | 1                         | 1                                   | 100                         | 0                                 | 1.61                      | 0                                   | 0                           | 100                               | 1                         | 1                                   | 1                           | 98.88                             | 1.12                      | 8.50                                | 0                           | 0                                 | 100                       | 1                                   | 1                           | 1                                 | 100                       | 1                                   | 1                           | 1                                 | 100 | 1 |
| 147561      | 149054 | PAO130 | 1                         | 1                                   | 100                         | 0                                 | 1.61                      | 0                                   | 0                           | 100                               | 1                         | 1                                   | 1                           | 100                               | 0                         | 8.59                                | 0                           | 0                                 | 100                       | 1                                   | 1                           | 1                                 | 100                       | 1                                   | 1                           | 1                                 | 100 | 1 |
| 149138      | 149425 | PAO131 | 1                         | 1                                   | 100                         | 0                                 | 1.61                      | 0                                   | 0                           | 100                               | 1                         | 1                                   | 1                           | 100                               | 0                         | 8.59                                | 0                           | 0                                 | 100                       | 1                                   | 1                           | 1                                 | 100                       | 1                                   | 1                           | 1                                 | 100 | 1 |
| 149425      | 150771 | PAO132 | 1                         | 1                                   | 100                         | 0                                 | 1.61                      | 0                                   | 0                           | 100                               | 1                         | 1                                   | 1                           | 100                               | 0                         | 8.59                                | 0                           | 0                                 | 100                       | 1                                   | 1                           | 1                                 | 100                       | 1                                   | 1                           | 1                                 | 100 | 1 |
| 150906      | 151823 | PAO133 | 1                         | 1                                   | 100                         | 0                                 | 1.61                      | 0                                   | 0                           | 100                               | 1                         | 1                                   | 1                           | 100                               | 0                         | 8.59                                | 0                           | 0                                 | 100                       | 1                                   | 1                           | 1                                 | 100                       | 1                                   | 1                           | 1                                 | 100 | 1 |
| 151936      | 153306 | PAO134 | 1                         | 1                                   | 100                         | 0                                 | 1.61                      | 0                                   | 0                           | 100                               | 1                         | 1                                   | 1                           | 100                               | 0                         | 8.59                                | 0                           | 0                                 | 100                       | 1                                   | 1                           | 1                                 | 100                       | 1                                   | 1                           | 1                                 | 100 | 1 |
| 153696      | 153836 | PAO135 | 1                         | 1                                   | 100                         | 0                                 | 1.61                      | 0                                   | 0                           | 100                               | 1                         | 1                                   | 1                           | 100                               | 0                         | 8.59                                | 0                           | 0                                 | 100                       | 1                                   | 1                           | 1                                 | 100                       | 1                                   | 1                           | 1                                 | 100 | 1 |
| 154417      | 155988 | PAO136 | 1                         | 1                                   | 100                         | 0                                 | 1.61                      | 0                                   | 0                           | 100                               | 1                         | 1                                   | 1                           | 100                               | 0                         | 8.59                                | 0                           | 0                                 | 100                       | 1                                   | 1                           | 1                                 | 100                       | 1                                   | 1                           | 1                                 | 100 | 1 |
| 155988      | 157085 | PAO137 | 1                         | 1                                   | 100                         | 0                                 | 1.61                      | 0                                   | 0                           | 100                               | 1                         | 1                                   | 1                           | 100                               | 0                         | 8.59                                | 0                           | 0                                 | 100                       | 1                                   | 1                           | 1                                 | 100                       | 1                                   | 1                           | 1                                 | 100 | 1 |
| 157108      | 158034 | PAO138 | 1                         | 1                                   | 100                         | 0                                 | 1.61                      | 0                                   | 0                           | 100                               | 1                         | 1                                   | 1                           | 100                               | 0                         | 8.59                                | 0                           | 0                                 | 100                       | 1                                   | 1                           | 1                                 | 100                       | 1                                   | 1                           | 1                                 | 100 | 1 |
| 158199      | 158762 | ohpC   | 1                         | 1                                   | 100                         | 0                                 | 1.61                      | 0                                   | 0                           | 100                               | 1                         | 1                                   | 1                           | 100                               | 0                         | 8.59                                | 0                           | 0                                 | 100                       | 1                                   | 1                           | 1                                 | 100                       | 1                                   | 1                           | 1                                 | 100 | 1 |
| 158907      | 160472 | ohpF   | 1                         | 1                                   | 100                         | 0                                 | 1.61                      | 0                                   | 0                           | 100                               | 1                         | 1                                   | 1                           | 100                               | 0                         | 8.59                                | 0                           | 0                                 | 100                       | 1                                   | 1                           | 1                                 | 100                       | 1                                   | 1                           | 1                                 | 100 | 1 |
| 160552      | 161448 | PAO141 | 1                         | 1                                   | 100                         | 0                                 | 1.61                      | 0                                   | 0                           | 100                               | 1                         | 1                                   | 1                           | 100                               | 0                         | 8.59                                | 0                           | 0                                 | 100                       | 1                                   | 1                           | 1                                 | 100                       | 1                                   | 1                           | 1                                 | 100 | 1 |
| 161906      | 163255 | PAO142 | 1                         | 1                                   | 100                         | 0                                 | 1.61                      | 1                                   | 1                           | 18.07                             | 81.93                     | 2.56                                | 1                           | 1                                 | 100                       | 0                                   | 8.59                        | 1                                 | 1                         | 78.15                               | 21.85                       | 8.03                              | 1                         | 1                                   | 1                           | 100                               | 0   |   |
| 163363      | 164415 | nub    | 1                         | 1                                   | 100                         | 0                                 | 1.61                      | 1                                   | 1                           | 9.61                              | 90.39                     | 0                                   | 0                           | 100                               | 0                         | 8.59                                | 1                           | 1                                 | 100                       | 0                                   | 0                           | 100                               | 0                         | 0                                   | 100                         | 0                                 | 100 | 0 |
| 164443      | 165069 | PAO144 | 1                         | 1                                   | 100                         | 0                                 | 1.61                      | 1                                   | 1                           | 100                               | 0                         | 9.61                                | 1                           | 1                                 | 100                       | 0                                   | 8.59                        | 1                                 | 1                         | 100                                 | 0                           | 10                                | 1                         | 1                                   | 1                           | 100                               | 0   |   |
| 165219      | 165737 | PAO145 | 1                         | 1                                   | 100                         | 0                                 | 1.61                      | 1                                   | 1                           | 100                               | 0                         | 9.61                                | 1                           | 1                                 | 100                       | 0                                   | 8.59                        | 1                                 | 1                         | 100                                 | 0                           | 10                                | 1                         | 1                                   | 1                           | 100                               | 0   |   |
| 165976      | 167073 | PAO146 | 1                         | 1                                   | 100                         | 0                                 | 1.61                      | 1                                   | 1                           | 100                               | 0                         | 9.61                                | 1                           | 1                                 | 100                       | 0                                   | 8.59                        | 1                                 | 1                         | 100                                 | 0                           | 10                                | 1                         | 1                                   | 1                           | 100                               | 0   |   |
| 167146      | 168108 | PAO147 | 1                         | 1                                   | 100                         | 0                                 | 1.61                      | 1                                   | 1                           | 100                               | 0                         | 9.61                                | 1                           | 1                                 | 100                       | 0                                   | 8.59                        | 1                                 | 1                         | 100                                 | 0                           | 10                                | 1                         | 1                                   | 1                           | 100                               | 0   |   |
| 168213      | 169163 | PAO148 | 1                         | 1                                   | 100                         | 0                                 | 1.61                      | 1                                   | 1                           | 100                               | 0                         | 9.61                                | 1                           | 1                                 | 100                       | 0                                   | 8.59                        | 1                                 | 1                         | 100                                 | 0                           | 10                                | 1                         | 1                                   | 1                           | 100                               | 0   |   |
| 169361      | 169906 | PAO149 | 1                         | 1                                   | 100                         | 0                                 | 1.61                      | 1                                   | 1                           | 100                               | 0                         | 9.61                                | 1                           | 1                                 | 25.46                     | 74.54                               | 2.93                        | 1                                 | 1                         | 100                                 | 0                           | 10                                | 1                         | 1                                   | 1                           | 100                               | 0   |   |
| 169903      | 170898 | PAO150 | 1                         | 1                                   | 100                         | 0                                 | 1.61                      | 1                                   | 1                           | 100                               | 0                         | 9.61                                | 0                           | 0                                 | 100                       | 0                                   | 8.59                        | 1                                 | 1                         | 100                                 | 0                           | 10                                | 1                         | 1                                   | 1                           | 100                               | 0   |   |
| 171047      | 173434 | PAO151 | 1                         | 1                                   | 100                         | 0                                 | 1.61                      | 1                                   | 1                           | 100                               | 0                         | 9.61                                | 0                           | 0                                 | 100                       | 0                                   | 8.59                        | 1                                 | 1                         | 100                                 | 0                           | 10                                | 1                         | 1                                   | 1                           | 100                               | 0   |   |
| 173811      | 174638 | pcwQ   | 1                         | 1                                   | 100                         | 0                                 | 1.61                      | 1                                   | 1                           | 100                               | 0                         | 9.61                                | 0                           | 0                                 | 100                       | 0                                   | 8.59                        | 1                                 | 1                         | 100                                 | 0                           | 10                                | 1                         | 1                                   | 1                           | 100                               | 0   |   |
| 174773      | 175492 | pcwH   | 1                         | 1                                   | 100                         | 0                                 | 1.61                      | 1                                   | 1                           | 100                               | 0                         | 9.61                                | 0                           | 0                                 | 100                       | 0                                   | 8.59                        | 1                                 | 1                         | 100                                 | 0                           | 10                                | 1                         | 1                                   | 1                           | 100                               | 0   |   |
| 175503      | 176108 | pcwG   | 1                         | 1                                   | 100                         | 0                                 | 1.61                      | 1                                   | 1                           | 100                               | 0                         | 9.61                                | 0                           | 0                                 | 100                       | 0                                   | 8.59                        | 1                                 | 1                         | 100                                 | 0                           | 10                                | 1                         | 1                                   | 1                           | 100                               | 0   |   |
| 176315      | 177154 | pcwR   | 1                         | 1                                   | 100                         | 0                                 | 1.61                      | 1                                   | 1                           | 100                               | 0                         | 9.61                                | 0                           | 0                                 | 100                       | 0                                   | 8.59                        | 1                                 | 1                         | 100                                 | 0                           | 10                                | 1                         | 1                                   | 1                           | 100                               | 0   |   |
| 177307      | 178458 | PAO156 | 1                         | 1                                   | 100                         | 0                                 | 1.61                      | 1                                   | 1                           | 100                               | 0                         | 9.61                                | 0                           | 0                                 | 100                       | 0                                   | 8.59                        | 1                                 | 1                         | 100                                 | 0                           | 10                                | 1                         | 1                                   | 1                           | 100                               | 0   |   |
| 178455      | 179525 | PAO157 | 1                         | 1                                   | 100                         | 0                                 | 1.61                      | 1                                   | 1                           | 100                               | 0                         | 9.61                                | 0                           | 0                                 | 100                       | 0                                   | 8.59                        | 1                                 | 1                         | 100                                 | 0                           | 10                                | 1                         | 1                                   | 1                           | 100                               | 0   |   |
| 179522      | 182569 | PAO158 | 1                         | 1                                   | 100                         | 0                                 | 1.61                      | 1                                   | 1                           | 100                               | 0                         | 9.61                                | 0                           | 0                                 | 100                       | 0                                   | 8.59                        | 1                                 | 1                         | 100                                 | 0                           | 10                                | 1                         | 1                                   | 1                           | 100                               | 0   |   |
| 182768      | 183706 | PAO159 | 1                         | 1                                   | 100                         | 0                                 | 1.61                      | 1                                   | 1                           | 100                               | 0                         | 9.61                                | 0                           | 0                                 | 100                       | 0                                   | 8.59                        | 1                                 | 1                         | 100                                 | 0                           | 10                                | 1                         | 1                                   | 1                           | 100                               | 0   |   |
| 183822      | 184007 | PAO160 | 1                         | 1                                   | 100                         | 0                                 | 1.61                      | 1                                   | 1                           | 100                               | 0                         | 9.61                                | 0                           | 0                                 | 100                       | 0                                   | 8.59                        | 1                                 | 1                         | 100                                 | 0                           | 10                                | 1                         | 1                                   | 1                           | 100                               | 0   |   |
| 184594      | 185928 | opdC   | 1                         | 1                                   | 100                         | 0                                 | 1.61                      | 1                                   | 1                           | 100                               | 0                         | 9.61                                | 0                           | 0                                 | 100                       | 0                                   | 8.59                        | 1                                 | 1                         | 100                                 | 0                           | 10                                | 1                         | 1                                   | 1                           | 100                               | 0   |   |
| 185957      | 186754 | PAO163 | 1                         | 1                                   | 100                         | 0                                 | 1.61                      | 1                                   | 1                           | 71.93                             | 28.07                     | 7.20                                | 0                           | 0                                 | 100                       | 0                                   | 8.59                        | 1                                 | 1                         | 100                                 | 0                           | 10                                | 1                         | 1                                   | 1                           | 100                               | 0   |   |
| 186832      | 188448 | PAO164 | 1                         | 1                                   | 100                         | 0                                 | 1.61                      | 0                                   | 0                           | 100                               | 1                         | 0                                   | 0                           | 100                               | 0                         | 8.59                                | 1                           | 1                                 | 100                       | 0                                   | 10                          | 1                                 | 1                         | 1                                   | 1                           | 100                               | 0   |   |
| 189120      | 189956 | PAO165 | 1                         | 1                                   | 100                         | 0                                 | 1.61                      | 0                                   | 0                           | 100                               | 1                         | 0                                   | 0                           | 100                               | 0                         | 8.59                                | 1                           | 1                                 | 100                       | 0                                   | 10                          | 1                                 | 1                         | 1                                   | 1                           | 100                               | 0   |   |
| 190198      | 191604 | PAO166 | 1                         | 1                                   | 100                         | 0                                 | 1.61                      | 0                                   | 0                           | 100                               | 1                         | 0                                   | 0                           |                                   |                           |                                     |                             |                                   |                           |                                     |                             |                                   |                           |                                     |                             |                                   |     |   |
